# Supplementary figures and images for: Genome-wide analysis of promoter architecture in Drosophila melanogaster
Source: HighWire-hosted journal article supplement (doi:10.1101/gr.112466.110), 2010-12-22

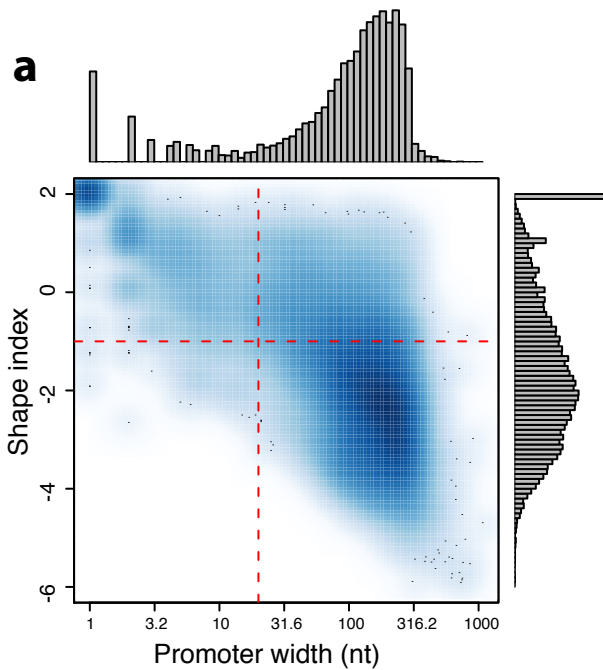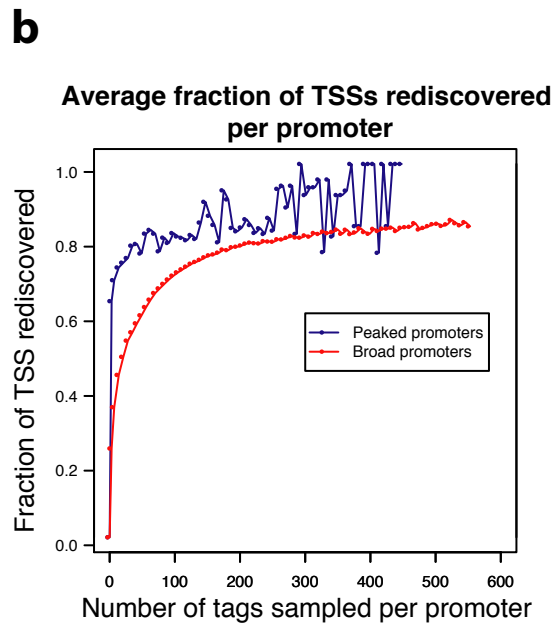

Supplement: SuppFig3_IntegratedPromotersScatter.pdf [file SuppFig3_IntegratedPromotersScatter.pdf]
